# Supplementary material
Source: publisher figshare collection journal article supplement (https://tandf.figshare.com/articles/dataset/_/10011461)
Supplement: Supplementary file 1 [file 1]

Archive with 6 entries (6 files):
- tssp_a_1647081_sm0838.docx
- tssp_a_1647081_sm0837.docx
- tssp_a_1647081_sm0836.docx
- tssp_a_1647081_sm0835.docx
- tssp_a_1647081_sm0834.docx
- tssp_a_1647081_sm0833.pdf
