# Supplementary material
Source: publisher figshare collection journal article supplement (https://tandf.figshare.com/articles/dataset/_/10011461)
Supplement: Supplementary file 1 [file 1 › tssp_a_1647081_sm0833.pdf]

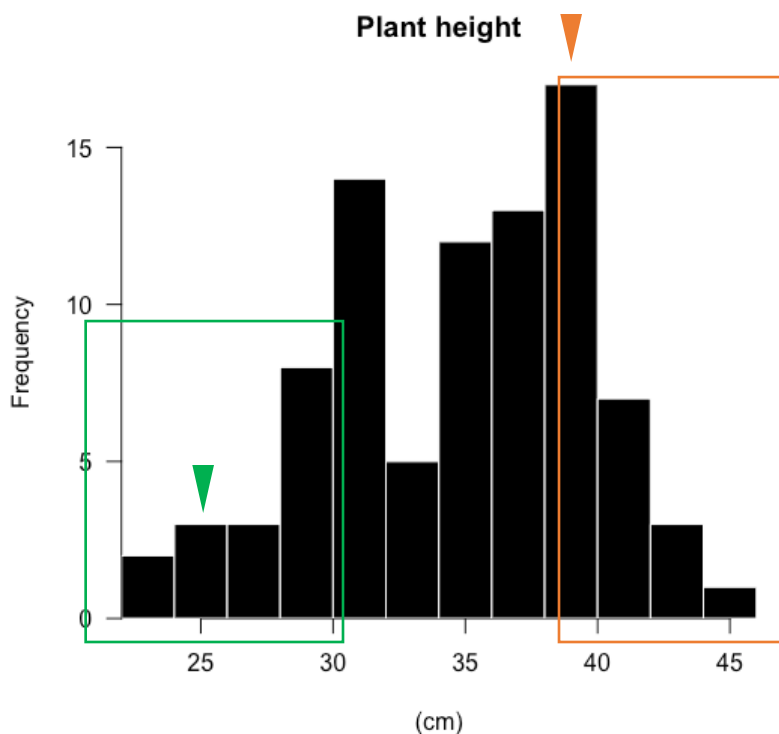

Supplemental Figure 1. Distribution of plant height among 96  $F_2$  population from 520-6 x Hitomebore. Green arrow head indicated the average shoot length of Hitomebore (WT) and orange arrow head indicated the average shoot length of 520-6. Green box indicated bottom 20 plants for plant height as wild type group and orange box indicated top 18 plants for plant height as mutant type group.

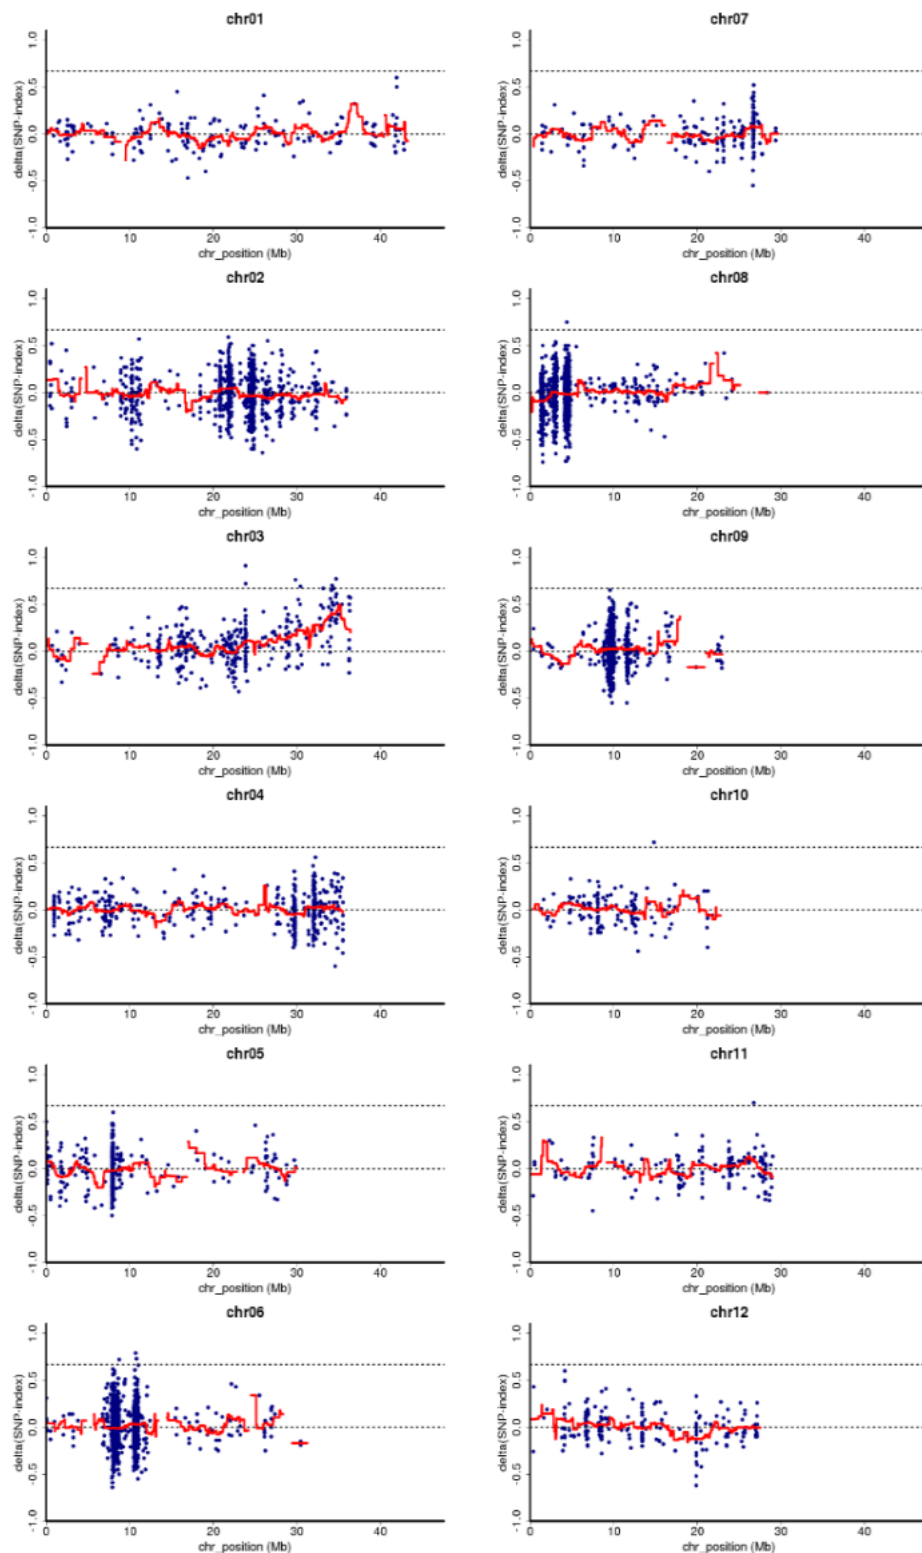

Supplemental Figure 2.  $\Delta$ SNP-index plot obtained by subtraction of wild-type bulk SNP-index from mutant bulk SNP-index for all the 12 rice chromosomes. Blue dots were each SNP and red lines indicated the moving average of  $\Delta$ SNP-index in 4 Mb windows.

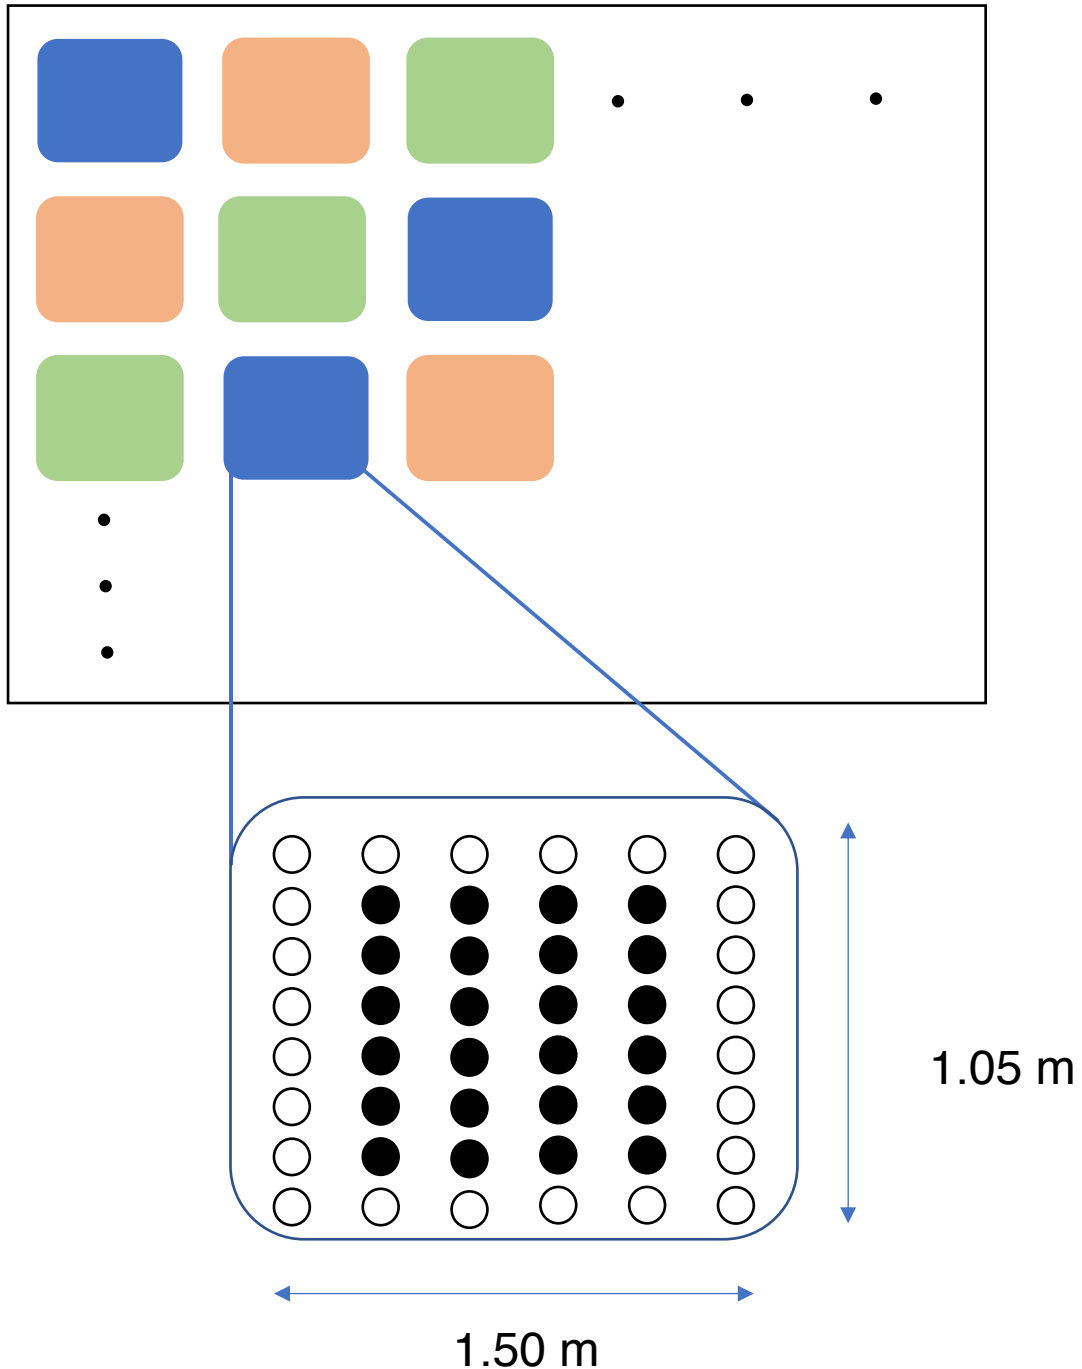

Supplemental Figure 3. Field design both in Kashimadai and Hikone. Each sample was planted in three randomized area, and each small plot include 48 (6 x 8) plants. Same color boxes indicate the area for same cultivars (three replications for one accession). To calculate the agronomic traits, outside samples (white circle) were not included. Only inside samples (black circle) were used.
