# Supplementary material
Source: publisher figshare collection journal article supplement (https://tandf.figshare.com/articles/dataset/_/10011461)
Supplement: Supplementary file 1 [file 1 › tssp_a_1647081_sm0834.docx]

|  | Normal | Low-N | Low-P | Low-K |
| --- | --- | --- | --- | --- |
| (NH4)2SO4 | 0.35 mM | - | 0.35 mM | 0.35 mM |
| Na2HPO4･12H2O | 0.17 mM | 0.17 mM | 4.25 µM | 0.17 mM |
| Ca(NO3)･4H2O | 0.18 mM | 0.27 mM | 0.18 mM | 0.36 mM |
| KNO3 | 0.54 mM | 0.08 mM | 0.54 mM | - |
| CaCl2･2H2O | 0.19 mM | 0.19 mM | 0.19 mM | - |
| MgSO4･7H2O | 0.47 mM | 0.47 mM | 0.47 mM | 0.39 mM |
| Mg(NO3)2･6H2O | - | - | - | 0.1 mM |
| Fe-citrate | 0.09 mM | 0.09 mM | 0.09 mM | 0.09 mM |
| CuSO4･5H2O | 0.16 µM | 0.16 µM | 0.16 µM | 0.16 µM |
| ZnSO4･7H2O | 0.15 µM | 0.15 µM | 0.15 µM | 0.15 µM |
| Na2MoO4･2H2O | 0.1 µM | 0.1 µM | 0.1 µM | 0.1 µM |
| MnSO4･5H2O | 4.6 µM | 4.6 µM | 4.6 µM | 4.6 µM |
| H3BO3 | 18 µM | 18 µM | 18 µM | 18 µM |
| K2SO4 | - | 0.27 mM | - | - |
| CaSO4･2H2O | - | 0.08 mM | - | - |
| NH4Cl | - | 0.40 mM | - | - |
| KCl | - | - | - | 13.5 µM |
| MES (NaOH, pH5.7) | 2 mM | 2 mM | 2 mM | 2 mM |

Table S1 Concentrations of nutrients used for hydroponic culture.
