# Supplementary material
Source: publisher figshare collection journal article supplement (https://tandf.figshare.com/articles/dataset/_/10011461)
Supplement: Supplementary file 1 [file 1 › tssp_a_1647081_sm0835.docx]

Table S2 Genotypes of four candidate genes for the causal gene of 520-6 in N-NIL and K-NIL.

|  | Os03g0742800 | Os03g0793500 | Os03g0796501 | Os03g0812800 |
| --- | --- | --- | --- | --- |
| N-NIL | Nipponbare | Koshihikari | Nipponbare | Nipponbare |
| K-NIL | Koshihikari | Nipponbare | Nipponbare | Nipponbare |
