# Supplementary material
Source: publisher figshare collection journal article supplement (https://tandf.figshare.com/articles/dataset/_/10011461)
Supplement: Supplementary file 1 [file 1 › tssp_a_1647081_sm0836.docx]

Table S3 Panicle traits, the number of branches and grains per one panicle in NILs harvested in Kashimadai low-N field in 2017. Data represent means ± SD (n=3). (*P* < 0.05, Tukey’s test)

| Line/trait | Primary branch | Secondary branch | Grain number |
| --- | --- | --- | --- |
| Koshihikari | 10.8±0.66ac | 22.0±2.88ac | 128±13.4a |
| K-NIL | 9.30±0.26b | 15.1±1.43b | 95.1±4.47b |
| Nipponbare | 9.89±0.63ab | 13.8±2.02ab | 90.8±8.20b |
| N-NIL | 11.6±0.51c | 21.4±2.06c | 129±10.1a |
