# Supplementary material
Source: publisher figshare collection journal article supplement (https://tandf.figshare.com/articles/dataset/_/10011461)
Supplement: Supplementary file 1 [file 1 › tssp_a_1647081_sm0837.docx]

Table S4 Soil chemical properties of paddy field soils

| Soil property | Kashimadai | |  | Hikone | |
| --- | --- | --- | --- | --- | --- |
|  | -N soil | +N soil |  | -F soil | +F soil |
| pH (H2O) | 5.3 | 5.1 |  | 5.9 | 6.0 |
| Total N (%) | 0.15 | 0.17 |  | 0.15 | 0.16 |
| NH4-N (mg/100g) | 3.28 | 3.42 |  | 3.99 | 5.21 |
| NO3-N (mg/100g) | 0.23 | 0.19 |  | 0.13 | 0.18 |
| Available P (mg/100g) | 9.3 | 8.9 |  | 8.2 | 15 |
