# Supplementary material
Source: publisher figshare collection journal article supplement (https://tandf.figshare.com/articles/dataset/_/10011461)
Supplement: Supplementary file 1 [file 1 › tssp_a_1647081_sm0838.docx]

Table S5 List of primers used in this study.

| Primer name | Sequence | Note |
| --- | --- | --- |
| OsGA2ox3_RT_F | TTCTTCGTCAACGTCGGCGACTCGTTGC | qPCR |
| OsGA2ox3_RT_R | TCTCAAACTGGGCCAGCCTGTTGTCTCC | qPCR |
| OsUBQ-F | GAAGGAGGAGGAAATCGAAC | qPCR |
| OsUBQ-R | CTTCACAGAGGTGATGCTAAGG | qPCR |
